# Supplementary material
Source: publisher figshare collection journal article supplement (https://frontiersin.figshare.com/ndownloader/files/12471071)
Supplement: Supplementary file [file 12471071]

## *Supplementary Material*

### **Title:**

# **Patient Selection in Human Papillomavirus Related Oropharyngeal Cancer: The Added Value of Prognostic Models in the New TNM 8<sup>th</sup> Edition Era**

**Running title:** Patient-selection in HPV+ Oropharyngeal Cancer

Sarah Deschuymmer, Rüveyda Dok, Annouschka Laenen, Esther Hauben, Sandra Nuyts\*.

\* **Correspondence:** [Sandra.nuyts@uzleuven.be](mailto:Sandra.nuyts@uzleuven.be)

### **Supplementary Tables and Figures:**

**S1:** Comparison of TNM 7<sup>th</sup> edition and 8<sup>th</sup> edition of the T- and N-stages and the number of included patients for each T- and N-stage.

**S2:** Predictors for overall survival in univariable (**A**) and multivariable (**B**) cox regression analysis.

**S3:** Patient and tumor characteristics separated by risk group according to the new proposed classification model.

**S4:** Locoregional control calculated with the cumulative incidence method with death as competing factor for the risk groups defined in figure 10.

**S5:** Kaplan-Meier curve for overall survival by N-stage (**A**) and T-stage (**B**) according to the TNM 8<sup>th</sup> edition for HPV positive oropharyngeal squamous cell carcinoma.

**S6:** Tumor volume of HPV+ OPC according to T-Stage.

**S1:** Comparison of TNM 7<sup>th</sup> edition and 8<sup>th</sup> edition of the T- and N-stages. T-stage remained practically unchanged apart from T4a and T4b (7<sup>th</sup> Ed.) combined to one T4-stage. N-stage, on the other hand, has changed extensively except for N0 and N3. Ipsilateral lymph nodes smaller than 6 cm independent of the number of suspicious lymph nodes, were all classified as N1. Bilateral or contralateral lymph nodes smaller than 6 cm were classified as N2 instead of N2c. Stage groups were stage I (green) for T1T2 N0N1 tumors, stage II (blue) for T1-T3 N2 and T3 N0N1 tumors and stage III (red) for T4 or N3 tumors. Stage IV was reserved for metastatic disease independent of the primary T and N-classification. The number of the included patients for each T- and N-stage are listed in the corresponding column or row.

| 8 <sup>th</sup> edition |                         | T1 | T2 | T3 | T4  |     |
|-------------------------|-------------------------|----|----|----|-----|-----|
|                         | 7 <sup>th</sup> edition | T1 | T2 | T3 | T4a | T4b |
| N0                      | N0                      | 0  | 10 | 1  | 6   | 0   |
| N1                      | N1                      | 3  | 3  | 4  | 0   | 0   |
|                         | N2a                     | 0  | 5  | 0  | 0   | 0   |
|                         | N2b                     | 8  | 14 | 10 | 8   | 2   |
| N2                      | N2c                     | 1  | 5  | 2  | 9   | 3   |
| N3                      | N3                      | 0  | 4  | 2  | 0   | 0   |
